# Supplementary material for: Zebrafish Xenograft: An Evolutionary Experiment in Tumour Biology
Source: Genes (Basel). 2017 Sep 5;8(9):220. doi: 10.3390/genes8090220 (PMC5615353; doi:10.3390/genes8090220)
Supplement: Supplementary file 1 [file genes-08-00220-s001.csv]

Nick	Query	Year	Count
1	"MMP1"[Title/Abstract] OR "MMP-1"[Title/Abstract] OR "matrix metalloproteinase 1"[Title/Abstract] OR "matrix metallopeptidase 1"[Title/Abstract] OR "interstitial collagenase"[Title/Abstract] OR "collagenase-1"[Title/Abstract]	2012	452
2	"MMP2"[Title/Abstract] OR "MMP-2"[Title/Abstract] OR "matrix metalloproteinase 2"[Title/Abstract] OR "matrix metallopeptidase 2"[Title/Abstract] OR "gelatinase A"[Title/Abstract] OR "72 kDa type IV collagenase"[Title/Abstract]	2012	1259
3	"MMP3"[Title/Abstract] OR "MMP-3"[Title/Abstract] OR "matrix metalloproteinase 3"[Title/Abstract] OR "matrix metallopeptidase 3"[Title/Abstract] OR "stromelysin-1"[Title/Abstract]	2012	268
7	"MMP7"[Title/Abstract] OR "MMP-7"[Title/Abstract] OR "matrix metalloproteinase 7"[Title/Abstract] OR "matrix metallopeptidase 7"[Title/Abstract] OR "matrilysin"[Title/Abstract]	2012	126
8	"MMP8"[Title/Abstract] OR "MMP-8"[Title/Abstract] OR "matrix metalloproteinase 8"[Title/Abstract] OR "matrix metallopeptidase 8"[Title/Abstract] OR "neutrophil collagenase"[Title/Abstract] OR "collagenase-2"[Title/Abstract]	2012	94
9	"MMP9"[Title/Abstract] OR "MMP-9"[Title/Abstract] OR "matrix metalloproteinase 9"[Title/Abstract] OR "matrix metallopeptidase 9"[Title/Abstract] OR "gelatinase B"[Title/Abstract] OR "92 kDa type IV collagenase"[Title/Abstract]	2012	1734
10	"MMP10"[Title/Abstract] OR "MMP-10"[Title/Abstract] OR "matrix metalloproteinase 10"[Title/Abstract] OR "matrix metallopeptidase 10"[Title/Abstract] OR "stromelysin-2"[Title/Abstract]	2012	30
11	"MMP11"[Title/Abstract] OR "MMP-11"[Title/Abstract] OR "matrix metalloproteinase 11"[Title/Abstract] OR "matrix metallopeptidase 11"[Title/Abstract] OR "stromelysin-3"[Title/Abstract]	2012	26
12	"MMP12"[Title/Abstract] OR "MMP-12"[Title/Abstract] OR "matrix metalloproteinase 12"[Title/Abstract] OR "matrix metallopeptidase 12"[Title/Abstract] OR "metalloelastase"[Title/Abstract]	2012	74
13	"MMP13"[Title/Abstract] OR "MMP-13"[Title/Abstract] OR "matrix metalloproteinase 13"[Title/Abstract] OR "matrix metallopeptidase 13"[Title/Abstract] OR "collagenase-3"[Title/Abstract]	2012	246
14	"MMP14"[Title/Abstract] OR "MMP-14"[Title/Abstract] OR "matrix metalloproteinase 14"[Title/Abstract] OR "matrix metallopeptidase 14"[Title/Abstract] OR "MT1-MMP"[Title/Abstract]	2012	161
15	"MMP15"[Title/Abstract] OR "MMP-15"[Title/Abstract] OR "matrix metalloproteinase 15"[Title/Abstract] OR "matrix metallopeptidase 15"[Title/Abstract] OR "MT2-MMP"[Title/Abstract]	2012	13
16	"MMP16"[Title/Abstract] OR "MMP-16"[Title/Abstract] OR "matrix metalloproteinase 16"[Title/Abstract] OR "matrix metallopeptidase 16"[Title/Abstract] OR "MT3-MMP"[Title/Abstract]	2012	11
17	"MMP17"[Title/Abstract] OR "MMP-17"[Title/Abstract] OR "matrix metalloproteinase 17"[Title/Abstract] OR "matrix metallopeptidase 17"[Title/Abstract] OR "MT4-MMP"[Title/Abstract]	2012	3
19	"MMP19"[Title/Abstract] OR "MMP-19"[Title/Abstract] OR "matrix metalloproteinase 19"[Title/Abstract] OR "matrix metallopeptidase 19"[Title/Abstract] OR "matrix metalloproteinase RASI"[Title/Abstract]	2012	8
20	"MMP20"[Title/Abstract] OR "MMP-20"[Title/Abstract] OR "matrix metalloproteinase 20"[Title/Abstract] OR "matrix metallopeptidase 20"[Title/Abstract] OR "enamelysin"[Title/Abstract]	2012	18
21	"MMP21"[Title/Abstract] OR "MMP-21"[Title/Abstract] OR "matrix metalloproteinase 21"[Title/Abstract] OR "matrix metallopeptidase 21"[Title/Abstract]	2012	0
23	"MMP23"[Title/Abstract] OR "MMP-23"[Title/Abstract] OR "matrix metalloproteinase 23"[Title/Abstract] OR "matrix metallopeptidase 23"[Title/Abstract]	2012	0
24	"MMP24"[Title/Abstract] OR "MMP-24"[Title/Abstract] OR "matrix metalloproteinase 24"[Title/Abstract] OR "matrix metallopeptidase 24"[Title/Abstract] OR "MT5-MMP"[Title/Abstract]	2012	2
25	"MMP25"[Title/Abstract] OR "MMP-25"[Title/Abstract] OR "matrix metalloproteinase 25"[Title/Abstract] OR "matrix metallopeptidase 25"[Title/Abstract] OR "MT6-MMP"[Title/Abstract]	2012	3
26	"MMP26"[Title/Abstract] OR "MMP-26"[Title/Abstract] OR "matrix metalloproteinase 26"[Title/Abstract] OR "matrix metallopeptidase 26"[Title/Abstract] OR "matrilysin 2"[Title/Abstract]	2012	5
27	"MMP27"[Title/Abstract] OR "MMP-27"[Title/Abstract] OR "matrix metalloproteinase 27"[Title/Abstract] OR "matrix metallopeptidase 27"[Title/Abstract]	2012	1
28	"MMP28"[Title/Abstract] OR "MMP-28"[Title/Abstract] OR "matrix metalloproteinase 28"[Title/Abstract] OR "matrix metallopeptidase 28"[Title/Abstract]	2012	2
1	"MMP1"[Title/Abstract] OR "MMP-1"[Title/Abstract] OR "matrix metalloproteinase 1"[Title/Abstract] OR "matrix metallopeptidase 1"[Title/Abstract] OR "interstitial collagenase"[Title/Abstract] OR "collagenase-1"[Title/Abstract]	2013	496
2	"MMP2"[Title/Abstract] OR "MMP-2"[Title/Abstract] OR "matrix metalloproteinase 2"[Title/Abstract] OR "matrix metallopeptidase 2"[Title/Abstract] OR "gelatinase A"[Title/Abstract] OR "72 kDa type IV collagenase"[Title/Abstract]	2013	1381
3	"MMP3"[Title/Abstract] OR "MMP-3"[Title/Abstract] OR "matrix metalloproteinase 3"[Title/Abstract] OR "matrix metallopeptidase 3"[Title/Abstract] OR "stromelysin-1"[Title/Abstract]	2013	339
7	"MMP7"[Title/Abstract] OR "MMP-7"[Title/Abstract] OR "matrix metalloproteinase 7"[Title/Abstract] OR "matrix metallopeptidase 7"[Title/Abstract] OR "matrilysin"[Title/Abstract]	2013	163
8	"MMP8"[Title/Abstract] OR "MMP-8"[Title/Abstract] OR "matrix metalloproteinase 8"[Title/Abstract] OR "matrix metallopeptidase 8"[Title/Abstract] OR "neutrophil collagenase"[Title/Abstract] OR "collagenase-2"[Title/Abstract]	2013	105
9	"MMP9"[Title/Abstract] OR "MMP-9"[Title/Abstract] OR "matrix metalloproteinase 9"[Title/Abstract] OR "matrix metallopeptidase 9"[Title/Abstract] OR "gelatinase B"[Title/Abstract] OR "92 kDa type IV collagenase"[Title/Abstract]	2013	1860
10	"MMP10"[Title/Abstract] OR "MMP-10"[Title/Abstract] OR "matrix metalloproteinase 10"[Title/Abstract] OR "matrix metallopeptidase 10"[Title/Abstract] OR "stromelysin-2"[Title/Abstract]	2013	51
11	"MMP11"[Title/Abstract] OR "MMP-11"[Title/Abstract] OR "matrix metalloproteinase 11"[Title/Abstract] OR "matrix metallopeptidase 11"[Title/Abstract] OR "stromelysin-3"[Title/Abstract]	2013	19
12	"MMP12"[Title/Abstract] OR "MMP-12"[Title/Abstract] OR "matrix metalloproteinase 12"[Title/Abstract] OR "matrix metallopeptidase 12"[Title/Abstract] OR "metalloelastase"[Title/Abstract]	2013	80
13	"MMP13"[Title/Abstract] OR "MMP-13"[Title/Abstract] OR "matrix metalloproteinase 13"[Title/Abstract] OR "matrix metallopeptidase 13"[Title/Abstract] OR "collagenase-3"[Title/Abstract]	2013	284
14	"MMP14"[Title/Abstract] OR "MMP-14"[Title/Abstract] OR "matrix metalloproteinase 14"[Title/Abstract] OR "matrix metallopeptidase 14"[Title/Abstract] OR "MT1-MMP"[Title/Abstract]	2013	153
15	"MMP15"[Title/Abstract] OR "MMP-15"[Title/Abstract] OR "matrix metalloproteinase 15"[Title/Abstract] OR "matrix metallopeptidase 15"[Title/Abstract] OR "MT2-MMP"[Title/Abstract]	2013	7
16	"MMP16"[Title/Abstract] OR "MMP-16"[Title/Abstract] OR "matrix metalloproteinase 16"[Title/Abstract] OR "matrix metallopeptidase 16"[Title/Abstract] OR "MT3-MMP"[Title/Abstract]	2013	7
17	"MMP17"[Title/Abstract] OR "MMP-17"[Title/Abstract] OR "matrix metalloproteinase 17"[Title/Abstract] OR "matrix metallopeptidase 17"[Title/Abstract] OR "MT4-MMP"[Title/Abstract]	2013	4
19	"MMP19"[Title/Abstract] OR "MMP-19"[Title/Abstract] OR "matrix metalloproteinase 19"[Title/Abstract] OR "matrix metallopeptidase 19"[Title/Abstract] OR "matrix metalloproteinase RASI"[Title/Abstract]	2013	6
20	"MMP20"[Title/Abstract] OR "MMP-20"[Title/Abstract] OR "matrix metalloproteinase 20"[Title/Abstract] OR "matrix metallopeptidase 20"[Title/Abstract] OR "enamelysin"[Title/Abstract]	2013	12
21	"MMP21"[Title/Abstract] OR "MMP-21"[Title/Abstract] OR "matrix metalloproteinase 21"[Title/Abstract] OR "matrix metallopeptidase 21"[Title/Abstract]	2013	1
23	"MMP23"[Title/Abstract] OR "MMP-23"[Title/Abstract] OR "matrix metalloproteinase 23"[Title/Abstract] OR "matrix metallopeptidase 23"[Title/Abstract]	2013	3
24	"MMP24"[Title/Abstract] OR "MMP-24"[Title/Abstract] OR "matrix metalloproteinase 24"[Title/Abstract] OR "matrix metallopeptidase 24"[Title/Abstract] OR "MT5-MMP"[Title/Abstract]	2013	2
25	"MMP25"[Title/Abstract] OR "MMP-25"[Title/Abstract] OR "matrix metalloproteinase 25"[Title/Abstract] OR "matrix metallopeptidase 25"[Title/Abstract] OR "MT6-MMP"[Title/Abstract]	2013	2
26	"MMP26"[Title/Abstract] OR "MMP-26"[Title/Abstract] OR "matrix metalloproteinase 26"[Title/Abstract] OR "matrix metallopeptidase 26"[Title/Abstract] OR "matrilysin 2"[Title/Abstract]	2013	6
27	"MMP27"[Title/Abstract] OR "MMP-27"[Title/Abstract] OR "matrix metalloproteinase 27"[Title/Abstract] OR "matrix metallopeptidase 27"[Title/Abstract]	2013	1
28	"MMP28"[Title/Abstract] OR "MMP-28"[Title/Abstract] OR "matrix metalloproteinase 28"[Title/Abstract] OR "matrix metallopeptidase 28"[Title/Abstract]	2013	7
1	"MMP1"[Title/Abstract] OR "MMP-1"[Title/Abstract] OR "matrix metalloproteinase 1"[Title/Abstract] OR "matrix metallopeptidase 1"[Title/Abstract] OR "interstitial collagenase"[Title/Abstract] OR "collagenase-1"[Title/Abstract]	2014	461
2	"MMP2"[Title/Abstract] OR "MMP-2"[Title/Abstract] OR "matrix metalloproteinase 2"[Title/Abstract] OR "matrix metallopeptidase 2"[Title/Abstract] OR "gelatinase A"[Title/Abstract] OR "72 kDa type IV collagenase"[Title/Abstract]	2014	1480
3	"MMP3"[Title/Abstract] OR "MMP-3"[Title/Abstract] OR "matrix metalloproteinase 3"[Title/Abstract] OR "matrix metallopeptidase 3"[Title/Abstract] OR "stromelysin-1"[Title/Abstract]	2014	364
7	"MMP7"[Title/Abstract] OR "MMP-7"[Title/Abstract] OR "matrix metalloproteinase 7"[Title/Abstract] OR "matrix metallopeptidase 7"[Title/Abstract] OR "matrilysin"[Title/Abstract]	2014	144
8	"MMP8"[Title/Abstract] OR "MMP-8"[Title/Abstract] OR "matrix metalloproteinase 8"[Title/Abstract] OR "matrix metallopeptidase 8"[Title/Abstract] OR "neutrophil collagenase"[Title/Abstract] OR "collagenase-2"[Title/Abstract]	2014	108
9	"MMP9"[Title/Abstract] OR "MMP-9"[Title/Abstract] OR "matrix metalloproteinase 9"[Title/Abstract] OR "matrix metallopeptidase 9"[Title/Abstract] OR "gelatinase B"[Title/Abstract] OR "92 kDa type IV collagenase"[Title/Abstract]	2014	1938
10	"MMP10"[Title/Abstract] OR "MMP-10"[Title/Abstract] OR "matrix metalloproteinase 10"[Title/Abstract] OR "matrix metallopeptidase 10"[Title/Abstract] OR "stromelysin-2"[Title/Abstract]	2014	45
11	"MMP11"[Title/Abstract] OR "MMP-11"[Title/Abstract] OR "matrix metalloproteinase 11"[Title/Abstract] OR "matrix metallopeptidase 11"[Title/Abstract] OR "stromelysin-3"[Title/Abstract]	2014	14
12	"MMP12"[Title/Abstract] OR "MMP-12"[Title/Abstract] OR "matrix metalloproteinase 12"[Title/Abstract] OR "matrix metallopeptidase 12"[Title/Abstract] OR "metalloelastase"[Title/Abstract]	2014	89
13	"MMP13"[Title/Abstract] OR "MMP-13"[Title/Abstract] OR "matrix metalloproteinase 13"[Title/Abstract] OR "matrix metallopeptidase 13"[Title/Abstract] OR "collagenase-3"[Title/Abstract]	2014	289
14	"MMP14"[Title/Abstract] OR "MMP-14"[Title/Abstract] OR "matrix metalloproteinase 14"[Title/Abstract] OR "matrix metallopeptidase 14"[Title/Abstract] OR "MT1-MMP"[Title/Abstract]	2014	180
15	"MMP15"[Title/Abstract] OR "MMP-15"[Title/Abstract] OR "matrix metalloproteinase 15"[Title/Abstract] OR "matrix metallopeptidase 15"[Title/Abstract] OR "MT2-MMP"[Title/Abstract]	2014	8
16	"MMP16"[Title/Abstract] OR "MMP-16"[Title/Abstract] OR "matrix metalloproteinase 16"[Title/Abstract] OR "matrix metallopeptidase 16"[Title/Abstract] OR "MT3-MMP"[Title/Abstract]	2014	15
17	"MMP17"[Title/Abstract] OR "MMP-17"[Title/Abstract] OR "matrix metalloproteinase 17"[Title/Abstract] OR "matrix metallopeptidase 17"[Title/Abstract] OR "MT4-MMP"[Title/Abstract]	2014	3
19	"MMP19"[Title/Abstract] OR "MMP-19"[Title/Abstract] OR "matrix metalloproteinase 19"[Title/Abstract] OR "matrix metallopeptidase 19"[Title/Abstract] OR "matrix metalloproteinase RASI"[Title/Abstract]	2014	10
20	"MMP20"[Title/Abstract] OR "MMP-20"[Title/Abstract] OR "matrix metalloproteinase 20"[Title/Abstract] OR "matrix metallopeptidase 20"[Title/Abstract] OR "enamelysin"[Title/Abstract]	2014	20
21	"MMP21"[Title/Abstract] OR "MMP-21"[Title/Abstract] OR "matrix metalloproteinase 21"[Title/Abstract] OR "matrix metallopeptidase 21"[Title/Abstract]	2014	3
23	"MMP23"[Title/Abstract] OR "MMP-23"[Title/Abstract] OR "matrix metalloproteinase 23"[Title/Abstract] OR "matrix metallopeptidase 23"[Title/Abstract]	2014	1
24	"MMP24"[Title/Abstract] OR "MMP-24"[Title/Abstract] OR "matrix metalloproteinase 24"[Title/Abstract] OR "matrix metallopeptidase 24"[Title/Abstract] OR "MT5-MMP"[Title/Abstract]	2014	6
25	"MMP25"[Title/Abstract] OR "MMP-25"[Title/Abstract] OR "matrix metalloproteinase 25"[Title/Abstract] OR "matrix metallopeptidase 25"[Title/Abstract] OR "MT6-MMP"[Title/Abstract]	2014	6
26	"MMP26"[Title/Abstract] OR "MMP-26"[Title/Abstract] OR "matrix metalloproteinase 26"[Title/Abstract] OR "matrix metallopeptidase 26"[Title/Abstract] OR "matrilysin 2"[Title/Abstract]	2014	4
27	"MMP27"[Title/Abstract] OR "MMP-27"[Title/Abstract] OR "matrix metalloproteinase 27"[Title/Abstract] OR "matrix metallopeptidase 27"[Title/Abstract]	2014	2
28	"MMP28"[Title/Abstract] OR "MMP-28"[Title/Abstract] OR "matrix metalloproteinase 28"[Title/Abstract] OR "matrix metallopeptidase 28"[Title/Abstract]	2014	6
1	"MMP1"[Title/Abstract] OR "MMP-1"[Title/Abstract] OR "matrix metalloproteinase 1"[Title/Abstract] OR "matrix metallopeptidase 1"[Title/Abstract] OR "interstitial collagenase"[Title/Abstract] OR "collagenase-1"[Title/Abstract]	2015	437
2	"MMP2"[Title/Abstract] OR "MMP-2"[Title/Abstract] OR "matrix metalloproteinase 2"[Title/Abstract] OR "matrix metallopeptidase 2"[Title/Abstract] OR "gelatinase A"[Title/Abstract] OR "72 kDa type IV collagenase"[Title/Abstract]	2015	1424
3	"MMP3"[Title/Abstract] OR "MMP-3"[Title/Abstract] OR "matrix metalloproteinase 3"[Title/Abstract] OR "matrix metallopeptidase 3"[Title/Abstract] OR "stromelysin-1"[Title/Abstract]	2015	395
7	"MMP7"[Title/Abstract] OR "MMP-7"[Title/Abstract] OR "matrix metalloproteinase 7"[Title/Abstract] OR "matrix metallopeptidase 7"[Title/Abstract] OR "matrilysin"[Title/Abstract]	2015	157
8	"MMP8"[Title/Abstract] OR "MMP-8"[Title/Abstract] OR "matrix metalloproteinase 8"[Title/Abstract] OR "matrix metallopeptidase 8"[Title/Abstract] OR "neutrophil collagenase"[Title/Abstract] OR "collagenase-2"[Title/Abstract]	2015	146
9	"MMP9"[Title/Abstract] OR "MMP-9"[Title/Abstract] OR "matrix metalloproteinase 9"[Title/Abstract] OR "matrix metallopeptidase 9"[Title/Abstract] OR "gelatinase B"[Title/Abstract] OR "92 kDa type IV collagenase"[Title/Abstract]	2015	2031
10	"MMP10"[Title/Abstract] OR "MMP-10"[Title/Abstract] OR "matrix metalloproteinase 10"[Title/Abstract] OR "matrix metallopeptidase 10"[Title/Abstract] OR "stromelysin-2"[Title/Abstract]	2015	47
11	"MMP11"[Title/Abstract] OR "MMP-11"[Title/Abstract] OR "matrix metalloproteinase 11"[Title/Abstract] OR "matrix metallopeptidase 11"[Title/Abstract] OR "stromelysin-3"[Title/Abstract]	2015	12
12	"MMP12"[Title/Abstract] OR "MMP-12"[Title/Abstract] OR "matrix metalloproteinase 12"[Title/Abstract] OR "matrix metallopeptidase 12"[Title/Abstract] OR "metalloelastase"[Title/Abstract]	2015	85
13	"MMP13"[Title/Abstract] OR "MMP-13"[Title/Abstract] OR "matrix metalloproteinase 13"[Title/Abstract] OR "matrix metallopeptidase 13"[Title/Abstract] OR "collagenase-3"[Title/Abstract]	2015	338
14	"MMP14"[Title/Abstract] OR "MMP-14"[Title/Abstract] OR "matrix metalloproteinase 14"[Title/Abstract] OR "matrix metallopeptidase 14"[Title/Abstract] OR "MT1-MMP"[Title/Abstract]	2015	169
15	"MMP15"[Title/Abstract] OR "MMP-15"[Title/Abstract] OR "matrix metalloproteinase 15"[Title/Abstract] OR "matrix metallopeptidase 15"[Title/Abstract] OR "MT2-MMP"[Title/Abstract]	2015	8
16	"MMP16"[Title/Abstract] OR "MMP-16"[Title/Abstract] OR "matrix metalloproteinase 16"[Title/Abstract] OR "matrix metallopeptidase 16"[Title/Abstract] OR "MT3-MMP"[Title/Abstract]	2015	16
17	"MMP17"[Title/Abstract] OR "MMP-17"[Title/Abstract] OR "matrix metalloproteinase 17"[Title/Abstract] OR "matrix metallopeptidase 17"[Title/Abstract] OR "MT4-MMP"[Title/Abstract]	2015	5
19	"MMP19"[Title/Abstract] OR "MMP-19"[Title/Abstract] OR "matrix metalloproteinase 19"[Title/Abstract] OR "matrix metallopeptidase 19"[Title/Abstract] OR "matrix metalloproteinase RASI"[Title/Abstract]	2015	15
20	"MMP20"[Title/Abstract] OR "MMP-20"[Title/Abstract] OR "matrix metalloproteinase 20"[Title/Abstract] OR "matrix metallopeptidase 20"[Title/Abstract] OR "enamelysin"[Title/Abstract]	2015	19
21	"MMP21"[Title/Abstract] OR "MMP-21"[Title/Abstract] OR "matrix metalloproteinase 21"[Title/Abstract] OR "matrix metallopeptidase 21"[Title/Abstract]	2015	2
23	"MMP23"[Title/Abstract] OR "MMP-23"[Title/Abstract] OR "matrix metalloproteinase 23"[Title/Abstract] OR "matrix metallopeptidase 23"[Title/Abstract]	2015	3
24	"MMP24"[Title/Abstract] OR "MMP-24"[Title/Abstract] OR "matrix metalloproteinase 24"[Title/Abstract] OR "matrix metallopeptidase 24"[Title/Abstract] OR "MT5-MMP"[Title/Abstract]	2015	3
25	"MMP25"[Title/Abstract] OR "MMP-25"[Title/Abstract] OR "matrix metalloproteinase 25"[Title/Abstract] OR "matrix metallopeptidase 25"[Title/Abstract] OR "MT6-MMP"[Title/Abstract]	2015	3
26	"MMP26"[Title/Abstract] OR "MMP-26"[Title/Abstract] OR "matrix metalloproteinase 26"[Title/Abstract] OR "matrix metallopeptidase 26"[Title/Abstract] OR "matrilysin 2"[Title/Abstract]	2015	4
27	"MMP27"[Title/Abstract] OR "MMP-27"[Title/Abstract] OR "matrix metalloproteinase 27"[Title/Abstract] OR "matrix metallopeptidase 27"[Title/Abstract]	2015	0
28	"MMP28"[Title/Abstract] OR "MMP-28"[Title/Abstract] OR "matrix metalloproteinase 28"[Title/Abstract] OR "matrix metallopeptidase 28"[Title/Abstract]	2015	7
1	"MMP1"[Title/Abstract] OR "MMP-1"[Title/Abstract] OR "matrix metalloproteinase 1"[Title/Abstract] OR "matrix metallopeptidase 1"[Title/Abstract] OR "interstitial collagenase"[Title/Abstract] OR "collagenase-1"[Title/Abstract]	2016	469
2	"MMP2"[Title/Abstract] OR "MMP-2"[Title/Abstract] OR "matrix metalloproteinase 2"[Title/Abstract] OR "matrix metallopeptidase 2"[Title/Abstract] OR "gelatinase A"[Title/Abstract] OR "72 kDa type IV collagenase"[Title/Abstract]	2016	1397
3	"MMP3"[Title/Abstract] OR "MMP-3"[Title/Abstract] OR "matrix metalloproteinase 3"[Title/Abstract] OR "matrix metallopeptidase 3"[Title/Abstract] OR "stromelysin-1"[Title/Abstract]	2016	367
7	"MMP7"[Title/Abstract] OR "MMP-7"[Title/Abstract] OR "matrix metalloproteinase 7"[Title/Abstract] OR "matrix metallopeptidase 7"[Title/Abstract] OR "matrilysin"[Title/Abstract]	2016	157
8	"MMP8"[Title/Abstract] OR "MMP-8"[Title/Abstract] OR "matrix metalloproteinase 8"[Title/Abstract] OR "matrix metallopeptidase 8"[Title/Abstract] OR "neutrophil collagenase"[Title/Abstract] OR "collagenase-2"[Title/Abstract]	2016	148
9	"MMP9"[Title/Abstract] OR "MMP-9"[Title/Abstract] OR "matrix metalloproteinase 9"[Title/Abstract] OR "matrix metallopeptidase 9"[Title/Abstract] OR "gelatinase B"[Title/Abstract] OR "92 kDa type IV collagenase"[Title/Abstract]	2016	1996
10	"MMP10"[Title/Abstract] OR "MMP-10"[Title/Abstract] OR "matrix metalloproteinase 10"[Title/Abstract] OR "matrix metallopeptidase 10"[Title/Abstract] OR "stromelysin-2"[Title/Abstract]	2016	46
11	"MMP11"[Title/Abstract] OR "MMP-11"[Title/Abstract] OR "matrix metalloproteinase 11"[Title/Abstract] OR "matrix metallopeptidase 11"[Title/Abstract] OR "stromelysin-3"[Title/Abstract]	2016	35
12	"MMP12"[Title/Abstract] OR "MMP-12"[Title/Abstract] OR "matrix metalloproteinase 12"[Title/Abstract] OR "matrix metallopeptidase 12"[Title/Abstract] OR "metalloelastase"[Title/Abstract]	2016	90
13	"MMP13"[Title/Abstract] OR "MMP-13"[Title/Abstract] OR "matrix metalloproteinase 13"[Title/Abstract] OR "matrix metallopeptidase 13"[Title/Abstract] OR "collagenase-3"[Title/Abstract]	2016	367
14	"MMP14"[Title/Abstract] OR "MMP-14"[Title/Abstract] OR "matrix metalloproteinase 14"[Title/Abstract] OR "matrix metallopeptidase 14"[Title/Abstract] OR "MT1-MMP"[Title/Abstract]	2016	160
15	"MMP15"[Title/Abstract] OR "MMP-15"[Title/Abstract] OR "matrix metalloproteinase 15"[Title/Abstract] OR "matrix metallopeptidase 15"[Title/Abstract] OR "MT2-MMP"[Title/Abstract]	2016	7
16	"MMP16"[Title/Abstract] OR "MMP-16"[Title/Abstract] OR "matrix metalloproteinase 16"[Title/Abstract] OR "matrix metallopeptidase 16"[Title/Abstract] OR "MT3-MMP"[Title/Abstract]	2016	9
17	"MMP17"[Title/Abstract] OR "MMP-17"[Title/Abstract] OR "matrix metalloproteinase 17"[Title/Abstract] OR "matrix metallopeptidase 17"[Title/Abstract] OR "MT4-MMP"[Title/Abstract]	2016	0
19	"MMP19"[Title/Abstract] OR "MMP-19"[Title/Abstract] OR "matrix metalloproteinase 19"[Title/Abstract] OR "matrix metallopeptidase 19"[Title/Abstract] OR "matrix metalloproteinase RASI"[Title/Abstract]	2016	7
20	"MMP20"[Title/Abstract] OR "MMP-20"[Title/Abstract] OR "matrix metalloproteinase 20"[Title/Abstract] OR "matrix metallopeptidase 20"[Title/Abstract] OR "enamelysin"[Title/Abstract]	2016	20
21	"MMP21"[Title/Abstract] OR "MMP-21"[Title/Abstract] OR "matrix metalloproteinase 21"[Title/Abstract] OR "matrix metallopeptidase 21"[Title/Abstract]	2016	0
23	"MMP23"[Title/Abstract] OR "MMP-23"[Title/Abstract] OR "matrix metalloproteinase 23"[Title/Abstract] OR "matrix metallopeptidase 23"[Title/Abstract]	2016	1
24	"MMP24"[Title/Abstract] OR "MMP-24"[Title/Abstract] OR "matrix metalloproteinase 24"[Title/Abstract] OR "matrix metallopeptidase 24"[Title/Abstract] OR "MT5-MMP"[Title/Abstract]	2016	3
25	"MMP25"[Title/Abstract] OR "MMP-25"[Title/Abstract] OR "matrix metalloproteinase 25"[Title/Abstract] OR "matrix metallopeptidase 25"[Title/Abstract] OR "MT6-MMP"[Title/Abstract]	2016	4
26	"MMP26"[Title/Abstract] OR "MMP-26"[Title/Abstract] OR "matrix metalloproteinase 26"[Title/Abstract] OR "matrix metallopeptidase 26"[Title/Abstract] OR "matrilysin 2"[Title/Abstract]	2016	5
27	"MMP27"[Title/Abstract] OR "MMP-27"[Title/Abstract] OR "matrix metalloproteinase 27"[Title/Abstract] OR "matrix metallopeptidase 27"[Title/Abstract]	2016	1
28	"MMP28"[Title/Abstract] OR "MMP-28"[Title/Abstract] OR "matrix metalloproteinase 28"[Title/Abstract] OR "matrix metallopeptidase 28"[Title/Abstract]	2016	1
